# Supplementary material for: Quantum chemistry of OsCl62− photoaquation products and the reaction scheme
Source: Royal Society of Chemistry journal article supplement (doi:10.1039/c8pp00553b), 2019-02-13

**Table S1.** Electronic and geometric structure of OsCl<sub>5</sub>(H<sub>2</sub>O)<sup>-</sup> (Figure S3). Multiplicity M; bond lengths ROsCl(1), ROsCl(2), ROsCl(3), ROsCl(4), ROsCl(5), RCl<sub>5</sub>-H<sub>1</sub>, RCl<sub>3</sub>-H<sub>2</sub>, ROs-O, RO-H<sub>1</sub>, RO-H<sub>2</sub>; bond angles ∠Cl(1)OsCl(2), ∠Cl(1)OsCl(3), ∠Cl(1)OsCl(4), ∠Cl(1)OsCl(5), ∠Cl(4)OsCl(2), ∠Cl(2)OsCl(5); atom charges q<sub>Os</sub>, q<sub>Cl(1)</sub>, q<sub>Cl(2)</sub>, q<sub>Cl(3)</sub>, q<sub>Cl(4)</sub>, q<sub>Cl(5)</sub>

| Methods      | M                         | ROsCl(1) | ROsCl(2)<br>ROsCl(3)<br>ROsCl(4)<br>ROsCl(5) | RCl <sub>5</sub> -H <sub>1</sub><br>RCl <sub>3</sub> -H <sub>2</sub> | ROs-O          | RO-H <sub>1</sub><br>RO-H <sub>2</sub> | ∠H <sub>1</sub> OH <sub>2</sub> | ∠Cl(1)OsCl(2)<br>∠Cl(1)OsCl(3)<br>∠Cl(1)OsCl(4)<br>∠Cl(1)OsCl(5) | ∠Cl(4)OsCl(2)<br>∠Cl(3)OsCl(5)        | ∠Cl(4)OsCl(3)<br>∠Cl(2)OsCl(5) | q <sub>Os</sub>  | q <sub>Cl(2)</sub> ,<br>q <sub>Cl(3)</sub> ,<br>q <sub>Cl(4)</sub> ,<br>q <sub>Cl(5)</sub> | q <sub>Cl(1)</sub>                   | q <sub>O</sub> | q <sub>H1</sub><br>q <sub>H2</sub> | E <sub>0</sub> , Hartree |           |
|--------------|---------------------------|----------|----------------------------------------------|----------------------------------------------------------------------|----------------|----------------------------------------|---------------------------------|------------------------------------------------------------------|---------------------------------------|--------------------------------|------------------|--------------------------------------------------------------------------------------------|--------------------------------------|----------------|------------------------------------|--------------------------|-----------|
| <b>gas</b>   |                           |          |                                              |                                                                      |                |                                        |                                 |                                                                  |                                       |                                |                  |                                                                                            |                                      |                |                                    |                          |           |
| 1            | ROHF/IMCP-SR1             | 3        | 2.284                                        | 2.380<br>2.426<br>2.380<br>2.426                                     | 2.608<br>2.595 | 2.189                                  | 0.952<br>0.952                  | 107.037                                                          | 95.431<br>96.014<br>95.280<br>95.895  | 90.622<br>89.029               | 89.027<br>89.098 | 0.786                                                                                      | -0.428<br>-0.476<br>-0.427<br>-0.477 | -0.333         | 0.002                              | 0.176<br>0.175           | -157.0766 |
| 2            | ROHF/IMCP-SR1             | 5        | 2.493                                        | 2.356<br>2.380<br>2.356<br>2.380                                     | 2.792<br>2.792 | 4.485                                  | 0.947                           | 103.318                                                          | 99.533<br>99.044<br>99.533<br>99.044  | 88.773<br>88.388               | 88.434<br>88.434 | 0.999                                                                                      | -0.357<br>-0.387<br>-0.357<br>-0.387 | -0.488         | -0.364                             | 0.170                    | -157.0837 |
| 3            | CASSCF(8,6)/IMCP-SR1      | 3        | 2.362                                        | 2.406<br>2.431<br>2.373<br>2.415                                     | 2.864<br>2.729 | 2.252                                  | 0.949<br>0.950                  | 107.521                                                          | 92.868<br>94.017<br>93.155<br>94.056  | 90.382<br>89.310               | 89.942<br>89.501 | 0.822                                                                                      | -0.453<br>-0.480<br>-0.402<br>-0.463 | -0.300         | -0.070                             | 0.179<br>0.179           | -157.1161 |
| 4            | CASSCF(6,6)/IMCP-SR1      | 5        | 2.492                                        | 2.377<br>2.401<br>2.378<br>2.402                                     | 2.788<br>2.785 | 4.508                                  | 0.947<br>0.946                  | 103.312                                                          | 100.092<br>99.667<br>99.760<br>99.451 | 88.141<br>88.700               | 88.221<br>88.376 | 1.019                                                                                      | -0.355<br>-0.397<br>-0.350<br>-0.397 | -0.496         | -0.365                             | 0.171                    | -157.0999 |
| 5            | ROHF/SBKJC                | 3        | 2.335                                        | 2.432<br>2.432<br>2.433<br>2.433                                     | 2.815<br>2.815 | 2.115                                  | 0.965<br>0.965                  | 117.481                                                          | 93.491<br>93.491<br>96.909<br>96.935  | 89.590<br>89.571               | 89.577<br>89.582 | -0.155                                                                                     | -0.246<br>-0.245<br>-0.263<br>-0.263 | -0.102         | -0.607                             | 0.441<br>0.441           | -180.9040 |
| 6            | ROHF/SBKJC                | 5        | 2.498                                        | 2.392<br>2.408<br>2.392<br>2.409                                     | 2.869<br>2.879 | 4.927                                  | 0.968<br>0.968                  | 107.732                                                          | 99.91<br>98.87<br>99.99<br>99.02      | 88.655<br>88.373               | 88.411<br>88.380 | 0.053                                                                                      | -0.160<br>-0.203<br>-0.160<br>-0.204 | -0.325         | -0.648                             | 0.323<br>0.324           | -180.9032 |
| 7            | CASSCF(10,8)/SBKJC        | 3        | 2.335                                        | 2.432<br>2.433<br>2.433<br>2.433                                     | 2.815<br>2.815 | 2.115                                  | 0.965<br>0.965                  | 117.481                                                          | 93.477<br>93.485<br>96.928<br>96.920  | 89.597<br>89.568               | 89.571<br>89.586 | -0.155                                                                                     | -0.246<br>-0.245<br>-0.263<br>-0.263 | -0.102         | -0.607                             | 0.441<br>0.441           | -180.9040 |
| 8            | CASSCF(10,8)/SBKJC        | 5        | 2.496                                        | 2.392<br>2.409<br>2.392<br>2.409                                     | 2.869<br>2.879 | 4.927                                  | 0.968<br>0.968                  | 107.745                                                          | 99.934<br>98.896<br>100.019<br>99.041 | 88.651<br>88.366               | 88.374<br>88.400 | 0.052                                                                                      | -0.160<br>-0.204<br>-0.160<br>-0.204 | -0.323         | -0.648                             | 0.323<br>0.324           | -180.9033 |
| <b>water</b> |                           |          |                                              |                                                                      |                |                                        |                                 |                                                                  |                                       |                                |                  |                                                                                            |                                      |                |                                    |                          |           |
| 9            | ROHF/IMCP-SR1/PCM (water) | 3        | 2.306                                        | 2.395<br>2.401<br>2.399<br>2.404                                     | 3.182<br>2.885 | 2.122                                  | 0.954<br>0.954                  | 108.739                                                          | 94.215<br>94.309<br>92.317<br>92.780  | 90.078<br>89.891               | 89.666<br>89.607 | 0.755                                                                                      | -0.458<br>-0.463<br>-0.465<br>-0.468 | -0.342         | -0.077                             | 0.262<br>0.256           | -157.1675 |
| 10           | ROHF/IMCP-SR1/PCM (water) | 5        | 2.593                                        | 2.369<br>2.373                                                       | 3.281<br>3.292 | 2.590                                  | 0.950<br>0.950                  | 105.571                                                          | 94.884<br>94.944                      | 89.845<br>89.578               | 89.386<br>89.517 | 1.041                                                                                      | -0.391<br>-0.394                     | -0.625         | -0.284                             | 0.219<br>0.219           | -157.1643 |

|    |                                   |   |       |                                  |                |       |                |         |                                       |                  |                  |        |                                      |        |        |                |           |
|----|-----------------------------------|---|-------|----------------------------------|----------------|-------|----------------|---------|---------------------------------------|------------------|------------------|--------|--------------------------------------|--------|--------|----------------|-----------|
|    |                                   |   |       | 2.369<br>2.373                   |                |       |                |         | 94.707<br>95.081                      |                  |                  |        | -0.390<br>-0.394                     |        |        |                |           |
| 11 | ROHF/IMCP-SR1/PCM (water)         | 5 | 2.618 | 2.385<br>2.399<br>2.385<br>2.400 | 2.905<br>2.922 | 4.495 | 0.947          | 0.947   | 90.160<br>90.430<br>90.208<br>90.445  | 92.308<br>87.882 | 89.914<br>89.890 | 1.194  | -0.394<br>-0.396<br>-0.394<br>-0.396 | -0.599 | -0.401 | 0.193<br>0.193 | -157.1639 |
| 12 | CASSCF(6,6)/IM-CP-SR1/PCM (water) | 3 | 2.378 | 2.416<br>2.421<br>2.391<br>2.393 | 3.350<br>3.047 | 2.166 | 0.952<br>0.952 | 108.478 | 91.922<br>92.152<br>91.522<br>91.475  | 90.155<br>90.086 | 89.778<br>89.768 | 0.789  | -0.472<br>-0.476<br>-0.433<br>-0.433 | -0.328 | -0.142 | 0.249<br>0.245 | -157.2061 |
| 13 | CASSCF(6,6)/IM-CP-SR1/PCM (water) | 5 | 2.617 | 2.409<br>2.417<br>2.408<br>2.417 | 2.898<br>2.908 | 4.482 | 0.947<br>0.947 | 104.675 | 90.547<br>90.683<br>90.568<br>90.676  | 92.328<br>87.942 | 89.810<br>89.894 | 1.222  | -0.403<br>-0.395<br>-0.402<br>-0.397 | -0.610 | -0.401 | 0.193          | -157.1813 |
| 14 | ROHF/SBKJC/PCM (water)            | 3 | 2.392 | 2.397<br>2.397<br>2.423<br>2.425 | 3.005<br>3.013 | 2.073 | 0.969<br>0.969 | 112.765 | 91.499<br>91.274<br>91.661<br>91.705  | 89.998<br>89.898 | 89.967<br>89.975 | -0.179 | -0.198<br>-0.197<br>-0.262<br>-0.265 | -0.224 | -0.622 | 0.474<br>0.473 | -181.0064 |
| 15 | ROHF/SBKJC/PCM (water)            | 5 | 2.374 | 2.647<br>2.648<br>2.388<br>2.388 | 3.012<br>3.024 | 2.128 | 0.971<br>0.971 | 111.901 | 94.150<br>94.665<br>92.520<br>92.519  | 89.681<br>89.808 | 89.973<br>89.764 | 0.186  | -0.511<br>-0.511<br>-0.163<br>-0.164 | -0.140 | -0.648 | 0.475<br>0.476 | -180.9830 |
| 16 | CASSCF(10,8)/SBKJC/PCM (water)    | 3 | 2.412 | 2.391<br>2.388<br>2.609<br>2.607 | 2.905<br>2.935 | 2.189 | 0.971<br>0.971 | 112.696 | 90.971<br>90.927<br>100.729<br>97.107 | 89.886<br>89.085 | 90.688<br>89.753 | 0.170  | -0.131<br>-0.128<br>-0.481<br>-0.480 | -0.217 | -0.654 | 0.460<br>0.460 | -181.0006 |
| 17 | CASSCF(10,8)/SBKJC/PCM (water)    | 5 | 2.396 | 2.621<br>2.618<br>2.403<br>2.411 | 2.861<br>2.866 | 2.187 | 0.971<br>0.971 | 112.823 | 100.981<br>99.793<br>89.541<br>90.312 | 90.242<br>89.958 | 89.854<br>89.999 | 0.216  | -0.491<br>-0.489<br>-0.157<br>-0.185 | -0.158 | -0.654 | 0.459<br>0.459 | -181.0148 |

**Table S2.** Electronic and geometric structure of  $\text{OsCl}_5(\text{OH})^{2-}$  (Figure S4). Multiplicity M; bond lengths ROsCl(1), ROsCl(2), ROsCl(3), ROsCl(4), ROsCl(5), RCl<sub>5</sub>-H, ROs-O, RO-H<sub>1</sub>, RO-H<sub>2</sub>; bond angles  $\angle \text{Cl}(1)\text{OsCl}(2)$ ,  $\angle \text{Cl}(1)\text{OsCl}(3)$ ,  $\angle \text{Cl}(1)\text{OsCl}(4)$ ,  $\angle \text{Cl}(1)\text{OsCl}(5)$ ,  $\angle \text{Cl}(4)\text{OsCl}(2)$ ,  $\angle \text{Cl}(2)\text{OsCl}(5)$ ; atom charges  $q_{\text{Os}}$ ,  $q_{\text{Cl}(1)}$ ,  $q_{\text{Cl}(2)}$ ,  $q_{\text{Cl}(3)}$ ,  $q_{\text{Cl}(4)}$ ,  $q_{\text{Cl}(5)}$

| Methods      | M                         | ROsCl(1) | ROsCl(2)<br>ROsCl(3)<br>ROsCl(4)<br>ROsCl(5) | ROs-O                            | RCl-H | RO-H  | $\angle \text{OOsCl}_2$<br>$\angle \text{OOsCl}_3$<br>$\angle \text{OOsCl}_4$<br>$\angle \text{OOsCl}_5$ | $\angle \text{Cl}_1\text{OsCl}_2$<br>$\angle \text{Cl}_1\text{OsCl}_3$<br>$\angle \text{Cl}_1\text{OsCl}_4$<br>$\angle \text{Cl}_1\text{OsCl}_5$ | $\angle \text{OsOH}$                 | $\angle \text{Cl}_4\text{OsCl}_2$<br>$\angle \text{Cl}_3\text{OsCl}_5$ | $\angle \text{Cl}_4\text{OsCl}_3$<br>$\angle \text{Cl}_2\text{OsCl}_5$ | $q_{\text{Os}}$  | $q_{\text{el}(2)}$ ,<br>$q_{\text{el}(3)}$ ,<br>$q_{\text{el}(4)}$ ,<br>$q_{\text{el}(5)}$ | $q_{\text{el}(1)}$                   | $q_{\text{O}}$ | $q_{\text{H}}$ | $E_0$ ,<br>Hartree |           |
|--------------|---------------------------|----------|----------------------------------------------|----------------------------------|-------|-------|----------------------------------------------------------------------------------------------------------|--------------------------------------------------------------------------------------------------------------------------------------------------|--------------------------------------|------------------------------------------------------------------------|------------------------------------------------------------------------|------------------|--------------------------------------------------------------------------------------------|--------------------------------------|----------------|----------------|--------------------|-----------|
| <b>gas</b>   |                           |          |                                              |                                  |       |       |                                                                                                          |                                                                                                                                                  |                                      |                                                                        |                                                                        |                  |                                                                                            |                                      |                |                |                    |           |
| 1            | ROHF/IMCP-SR1             | 3        | 2.505                                        | 2.425<br>2.463<br>2.413<br>2.413 | 1.967 | 2.643 | 0.945                                                                                                    | 88.436<br>87.410<br>89.992<br>89.964                                                                                                             | 91.255<br>92.899<br>90.018<br>90.034 | 107.174                                                                | 90.646<br>89.337                                                       | 89.367<br>90.649 | 0.917                                                                                      | -0.527<br>-0.559<br>-0.503<br>-0.503 | -0.612         | -0.346         | 0.132              | -156.4411 |
| 2            | ROHF/IMCP-SR1             | 5        | 2.429                                        | 2.438<br>2.438<br>2.681<br>2.856 | 1.922 | 2.533 | 0.950                                                                                                    | 90.224<br>90.301<br>90.197<br>79.612                                                                                                             | 89.611<br>89.617<br>93.860<br>96.331 | 106.471                                                                | 91.781<br>88.345                                                       | 91.719<br>88.305 | 1.101                                                                                      | -0.507<br>-0.507<br>-0.688<br>-0.745 | -0.521         | -0.300         | 0.167              | -156.4419 |
| 3            | CASSCF(6,6)/IMCP-SR1      | 3        | 2.458                                        | 2.455<br>2.454<br>2.431<br>2.474 | 1.935 | 2.618 | 0.945                                                                                                    | 89.781<br>89.913<br>89.056<br>86.885                                                                                                             | 90.154<br>90.136<br>91.961<br>92.097 | 108.057                                                                | 90.435<br>89.610                                                       | 90.391<br>89.544 | 0.913                                                                                      | -0.555<br>-0.555<br>-0.515<br>-0.545 | -0.569         | -0.325         | 0.151              | -156.4560 |
| 4            | CASSCF(6,6)/IMCP-SR1      | 5        | 2.429                                        | 2.681<br>2.854<br>2.438<br>2.438 | 1.922 | 2.535 | 0.950                                                                                                    | 90.213<br>79.701<br>90.247<br>90.253                                                                                                             | 93.821<br>96.265<br>89.622<br>89.634 | 106.481                                                                | 91.744<br>88.326                                                       | 88.325<br>91.748 | 1.101                                                                                      | -0.688<br>-0.744<br>-0.507<br>-0.507 | -0.521         | -0.300         | 0.167              | -156.4419 |
| 5            | ROHF/SBKJC                | 3        | 2.508                                        | 2.421<br>2.455<br>2.465<br>2.466 | 2.011 | 2.801 | 0.965                                                                                                    | 89.151<br>88.279<br>88.976<br>88.984                                                                                                             | 91.309<br>91.262<br>91.014<br>91.015 | 113.401                                                                | 90.621<br>89.325                                                       | 89.347<br>90.617 | 0.085                                                                                      | -0.286<br>-0.326<br>-0.355<br>-0.355 | -0.425         | -0.645         | 0.307              | -180.2804 |
| 6            | ROHF/SBKJC                | 5        | 2.438                                        | 2.538<br>2.591<br>2.639<br>2.641 | 1.924 | 2.776 | 0.965                                                                                                    | 89.256<br>85.998<br>89.862<br>89.607                                                                                                             | 91.786<br>92.960<br>90.206<br>90.262 | 116.692                                                                | 91.696<br>88.167                                                       | 88.379<br>91.722 | 0.488                                                                                      | -0.417<br>-0.462<br>-0.509<br>-0.510 | -0.312         | -0.631         | 0.352              | -180.2908 |
| 7            | CASSCF(10,8)/SBKJC        | 3        | 2.508                                        | 2.421<br>2.455<br>2.465<br>2.465 | 2.011 | 2.801 | 0.965                                                                                                    | 89.151<br>88.279<br>88.976<br>88.984                                                                                                             | 91.309<br>91.262<br>91.014<br>91.015 | 113.401                                                                | 90.621<br>89.325                                                       | 90.617<br>89.347 | 0.085                                                                                      | -0.286<br>-0.326<br>-0.355<br>-0.355 | -0.425         | -0.645         | 0.307              | -180.2805 |
| 8            | CASSCF(10,8)/SBKJC        | 5        | 2.450                                        | 2.698<br>2.878<br>2.466<br>2.465 | 1.931 | 2.700 | 0.967                                                                                                    | 91.334<br>80.372<br>90.203<br>90.157                                                                                                             | 92.867<br>95.427<br>89.677<br>89.711 | 114.872                                                                | 91.710<br>88.341                                                       | 88.308<br>91.741 | 0.455                                                                                      | -0.574<br>-0.672<br>-0.295<br>-0.295 | -0.333         | -0.645         | 0.359              | -180.3058 |
| <b>water</b> |                           |          |                                              |                                  |       |       |                                                                                                          |                                                                                                                                                  |                                      |                                                                        |                                                                        |                  |                                                                                            |                                      |                |                |                    |           |
| 9            | ROHF/IMCP-SR1/PCM (water) | 3        | 2.498                                        | 2.431<br>2.424<br>2.394<br>2.402 | 1.965 | 2.705 | 0.947                                                                                                    | 88.309<br>88.485<br>90.478<br>90.584                                                                                                             | 91.388<br>91.822<br>89.692<br>89.248 | 110.070                                                                | 89.752<br>90.446                                                       | 89.128<br>90.734 | 0.825                                                                                      | -0.525<br>-0.515<br>-0.473<br>-0.481 | -0.604         | -0.409         | 0.182              | -156.7228 |
| 10           | ROHF/IMCP-SR1/PCM (water) | 5        | 2.414                                        | 2.429<br>2.429<br>2.692<br>2.723 | 1.921 | 2.746 | 0.951                                                                                                    | 90.538<br>90.644<br>87.907<br>85.243                                                                                                             | 89.392<br>89.396<br>94.053<br>92.798 | 111.667                                                                | 90.524<br>89.646                                                       | 90.428<br>89.546 | 1.011                                                                                      | -0.487<br>-0.488<br>-0.704<br>-0.708 | -0.490         | -0.344         | 0.211              | -156.7172 |

|    |                                  |   |         |                                          |         |             |             |                                      |                                      |         |                  |                  |        |                                      |        |        |       |               |
|----|----------------------------------|---|---------|------------------------------------------|---------|-------------|-------------|--------------------------------------|--------------------------------------|---------|------------------|------------------|--------|--------------------------------------|--------|--------|-------|---------------|
| 11 | CASSCF(6,6)/IMCP-SR1/PCM (water) | 3 | 2.456   | 2.440<br>2.440<br>2.429<br>2.442         | 1.931   | 2.722       | 0.948       | 90.261<br>90.329<br>88.708<br>88.589 | 89.772<br>89.637<br>91.184<br>91.519 | 112.007 | 89.975<br>90.330 | 89.708<br>90.015 | 0.815  | -0.537<br>-0.538<br>-0.504<br>-0.506 | -0.554 | -0.380 | 0.204 | -156.7378     |
| 12 | CASSCF(6,6)/IMCP-SR1/PCM (water) | 5 | 2.416   | 2.431<br>2.431<br>2.694<br>2.727         | 1.921   | 2.729       | 0.951       | 90.395<br>90.407<br>88.394<br>84.749 | 89.615<br>89.575<br>92.975<br>93.882 | 111.632 | 90.264<br>89.969 | 90.088<br>89.776 | 1.014  | -0.488<br>-0.488<br>-0.704<br>-0.709 | -0.490 | -0.346 | 0.212 | -156.7173     |
| 13 | ROHF/SBKJC                       | 3 | 2.43235 | 2.41791<br>2.43306<br>2.43310<br>2.43386 | 1.92379 | 2.9287<br>8 | 0.9688<br>7 | 87.555<br>91.147<br>90.340<br>90.320 | 91.270<br>90.028<br>89.497<br>89.845 | 120.018 | 90.013<br>89.889 | 90.115<br>89.998 | -0.087 | -0.315<br>-0.321<br>-0.327<br>-0.328 | -0.327 | -0.684 | 0.391 | -180.5768     |
| 14 | ROHF/SBKJC                       | 5 | 2.412   | 2.616<br>2.656<br>2.458<br>2.459         | 1.917   | 3.074       | 0.970       | 87.958<br>91.202<br>89.880<br>90.137 | 91.200<br>89.642<br>90.026<br>89.976 | 121.121 | 91.174<br>89.273 | 89.383<br>56.479 | 0.281  | -0.531<br>-0.549<br>-0.321<br>-0.323 | -0.275 | -0.690 | 0.409 | -180.5662     |
| 15 | CASSCF(10,8)/SBKJC/PCM (water)   | 3 | 2.421   | 2.422<br>2.439<br>2.436<br>2.436         | 1.942   | 2.931       | 0.968       | 86.929<br>90.733<br>90.502<br>90.479 | 91.826<br>90.512<br>89.327<br>89.697 | 119.885 | 90.072<br>89.839 | 90.160<br>89.968 | -0.129 | -0.331<br>-0.340<br>-0.322<br>-0.323 | -0.227 | -0.707 | 0.380 | -180.6055     |
| 16 | CASSCF(10,8)/SBKJC/PCM (water)   | 5 | 2.412   | 2.616<br>2.656<br>2.458<br>2.459         | 1.917   | 3.074       | 0.9704      | 87.958<br>91.202<br>89.880<br>90.137 | 91.200<br>89.642<br>90.026<br>89.976 | 121.121 | 91.174<br>89.273 | 89.383<br>90.170 | 0.280  | -0.530<br>-0.549<br>-0.321<br>-0.323 | -0.275 | -0.690 | 0.409 | -<br>180.5663 |

**Table S3.** Energies and orbital populations of  $\text{OsCl}_5(\text{H}_2\text{O})^-$  and  $\text{OsCl}_5(\text{OH})^{2-}$  in triplet state as a result of CASSCF(6,6)/IMCP-SR1 gas phase calculations (GAMESS-US package).

|                                       | State | Energy, eV | Delta Energy of transition<br>$T1 \rightarrow T_i$ , eV<br>(nm) | Orbitals population |        |        |      |      |        |
|---------------------------------------|-------|------------|-----------------------------------------------------------------|---------------------|--------|--------|------|------|--------|
|                                       |       |            |                                                                 | HOMO-3              | HOMO-2 | HOMO-1 | HOMO | LUMO | LUMO+1 |
|                                       |       |            |                                                                 | A                   | A      | A      | A    | A    | A      |
| $\text{OsCl}_5(\text{H}_2\text{O})^-$ |       |            |                                                                 |                     |        |        |      |      |        |
| 1                                     | T1    | -4275.35   | 0                                                               | 1.92                | 1.9    | 0.98   | 0.97 | 0.04 | 0.03   |
| 2                                     | T2    | -4271.36   | 3.97 (312)                                                      | 1.93                | 1.88   | 0.62   | 0.38 | 0.07 | 0.94   |
| 3                                     | T3    | -4270.98   | 4.37 (284)                                                      | 1.87                | 1.81   | 0.47   | 0.65 | 0.31 | 0.61   |
| 4                                     | T4    | -4270.70   | 4.65 (267)                                                      | 1.84                | 1.12   | 1.32   | 1.23 | 0.08 | 0.17   |
| 5                                     | T5    | -4270.14   | 5.21 (238)                                                      | 1.87                | 1.13   | 1.15   | 1.3  | 0.28 | 0.03   |
| 6                                     | Q1    | -4269.82   | 5.53 (224)                                                      | 1.79                | 1.09   | 0.97   | 0.97 | 0.94 | 0.04   |
| 7                                     | T6    | -4269.75   | 5.60 (221)                                                      | 1.77                | 1.82   | 0.61   | 0.69 | 0.67 | 0.16   |
| 8                                     | T7    | -4269.39   | 5.95 (208)                                                      | 1.87                | 1.65   | 0.73   | 0.69 | 0.74 | 0.04   |
| $\text{OsCl}_5(\text{OH})^{2-}$       |       |            |                                                                 |                     |        |        |      |      |        |
| 9                                     | T1    | -4256.73   | 0                                                               | 1.88                | 1.75   | 0.92   | 0.97 | 0.26 | 0.05   |
| 10                                    | T2    | -4252.92   | 3.81 (325)                                                      | 1.89                | 1.78   | 0.19   | 0.94 | 0.97 | 0.05   |
| 11                                    | T3    | -4252.30   | 4.44 (279)                                                      | 1.85                | 1.77   | 0.94   | 0.16 | 1.05 | 0.06   |
| 12                                    | T4    | -4250.65   | 6.08 (204)                                                      | 1.84                | 1.65   | 0.92   | 0.11 | 0.25 | 0.97   |
| 13                                    | T5    | -4250.26   | 6.48 (191)                                                      | 1.85                | 1.67   | 0.13   | 0.97 | 0.16 | 0.96   |
| 14                                    | Q1    | -4249.73   | 6.70 (185)                                                      | 1.03                | 1.78   | 0.97   | 0.96 | 1.05 | 0.03   |
| 15                                    | T6    | -4249.71   | 7.02 (177)                                                      | 0.98                | 1.71   | 1.74   | 0.98 | 0.32 | 0.03   |
| 16                                    | T7    | -4249.58   | 7.15 (173)                                                      | 1.05                | 1.67   | 0.97   | 1.82 | 0.25 | 0.03   |

**Table S4.** Energies and orbital populations of  $\text{OsCl}_5(\text{H}_2\text{O})^-$  and  $\text{OsCl}_5(\text{OH})^{2-}$  in quintet state as a result of CASSCF(6,6)/MCP-SR1 gas phase calculations (GAMESS-US package).

|                                       | State        | Energy, eV | Delta Energy of transition<br>$Q1 \rightarrow Q_i$ , eV<br>(nm) | Orbitals population |        |        |        |      |      |
|---------------------------------------|--------------|------------|-----------------------------------------------------------------|---------------------|--------|--------|--------|------|------|
|                                       |              |            |                                                                 | HOMO-4              | HOMO-3 | HOMO-2 | HOMO-1 | HOMO | LUMO |
|                                       |              |            |                                                                 | A                   | A      | A      | A      | A    | A    |
| $\text{OsCl}_5(\text{H}_2\text{O})^-$ |              |            |                                                                 |                     |        |        |        |      |      |
| 1                                     | Q1           | -4257.01   | 0                                                               | 1.83                | 1.10   | 0.99   | 0.99   | 0.98 | 0.05 |
| 2                                     | Q2           | -4250.38   | 6.62 (187)                                                      | 1.32                | 1.50   | 0.97   | 1.08   | 0.72 | 0.35 |
| 3                                     | Q3           | -4250.29   | 6.71 (185)                                                      | 1.06                | 1.13   | 1.59   | 1.03   | 0.91 | 0.14 |
| 4                                     | Q4           | -4250.27   | 6.73 (184)                                                      | 1.36                | 1.26   | 1.22   | 0.99   | 0.62 | 0.46 |
| 5                                     | Q5           | -4250.20   | 6.80 (182)                                                      | 1.09                | 1.01   | 1.01   | 1.76   | 0.88 | 0.17 |
| 6                                     | Q6           | -4249.62   | 7.38 (168)                                                      | 0.99                | 0.98   | 1.05   | 0.97   | 1.88 | 0.05 |
| 7                                     | Q7           | -4248.92   | 8.08 (153)                                                      | 1.51                | 0.44   | 0.98   | 1.00   | 1.00 | 1.00 |
| 8                                     | Q8           | -4248.43   | 8.57 (144)                                                      | 1.58                | 1.01   | 0.93   | 0.44   | 0.92 | 0.98 |
| $\text{OsCl}_5(\text{OH})^{2-}$       |              |            |                                                                 |                     |        |        |        |      |      |
| 9                                     | Q1           | 4274.91    | 0                                                               | 1.68                | 0.35   | 0.99   | 0.87   | 0.98 | 1.04 |
| 10                                    | Q2           | 4271.45    | 3.46 (358)                                                      | 1.77                | 1.05   | 1.01   | 0.75   | 0.26 | 1.1  |
| 11                                    | Q3           | 4270.30    | 4.60 (270)                                                      | 1.65                | 1.08   | 0.79   | 0.98   | 0.99 | 0.46 |
| 12                                    | Q4           | 4270.17    | 4.7 (264)                                                       | 1.72                | 0.99   | 0.75   | 0.58   | 0.84 | 1.08 |
| 13                                    | Q5           | 4270.17    | 4.74 (262)                                                      | 1.65                | 1.01   | 0.57   | 0.88   | 0.92 | 0.95 |
| 14                                    | Sp1<br>(M=7) | 4269.12    | 5.79 (214)                                                      | 1                   | 1      | 1      | 1      | 1    | 1    |
| 15                                    | Q6           | 4268.9947  | 5.91 (210)                                                      | 1.09                | 0.19   | 1.13   | 0.88   | 0.98 | 1.66 |
| 16                                    | Q7           | 4268.2216  | 6.69 (185)                                                      | 1.02                | 0.36   | 0.98   | 1.35   | 1.23 | 0.97 |

**Table S5.** Energies and orbital populations of  $\text{OsCl}_5(\text{H}_2\text{O})^-$  and  $\text{OsCl}_5(\text{OH})^{2-}$  in triplet state as a result of CASSCF(6,6)/IMCP-SR1/PCM aqueous phase calculations (GAMESS-US package).

|                                       | State | Energy, eV | Delta Energy of transition $Q1 \rightarrow Q_i$ , eV (nm) | Orbitals population |        |        |      |      |        |
|---------------------------------------|-------|------------|-----------------------------------------------------------|---------------------|--------|--------|------|------|--------|
|                                       |       |            |                                                           | HOMO-3              | HOMO-2 | HOMO-1 | HOMO | LUMO | LUMO+1 |
|                                       |       |            |                                                           | A                   | A      | A      | A    | A    | A      |
| $\text{OsCl}_5(\text{H}_2\text{O})^-$ |       |            |                                                           |                     |        |        |      |      |        |
| 1                                     | T1    | -4277.80   | 0                                                         | 1.92                | 1.91   | 0.97   | 0.97 | 0.04 | 0.01   |
| 2                                     | T2    | -4273.81   | 3.98 (312)                                                | 1.93                | 1.92   | 0.77   | 0.21 | 0.07 | 0.93   |
| 3                                     | T3    | -4273.42   | 4.37 (284)                                                | 1.92                | 1.91   | 0.25   | 0.78 | 0.28 | 0.69   |
| 4                                     | T4    | -4272.93   | 4.87 (255)                                                | 1.43                | 1.57   | 1.52   | 1.11 | 0.14 | 0.08   |
| 5                                     | T5    | -4272.44   | 5.35 (232)                                                | 1.37                | 1.64   | 1.06   | 1.37 | 0.26 | 0.01   |
| 6                                     | T6    | -4272.11   | 5.69 (218)                                                | 1.92                | 1.71   | 0.5    | 0.85 | 0.63 | 0.17   |
| 7                                     | Q1    | -4271.89   | 5.91 (210)                                                | 1.46                | 1.46   | 0.97   | 0.97 | 0.93 | 0.04   |
| 8                                     | T7    | -4271.72   | 6.08 (204)                                                | 1.53                | 1.86   | 0.93   | 0.86 | 0.53 | 0.04   |
| $\text{OsCl}_5(\text{OH})^{2-}$       |       |            |                                                           |                     |        |        |      |      |        |
| 9                                     | T1    | -4265.06   | 0                                                         | 1.98                | 1.98   | 0.99   | 1.00 | 0.02 | 0.01   |
| 10                                    | T2    | -4264.58   | 0.48 (2579)                                               | 1.97                | 0.99   | 1.96   | 0.99 | 0.03 | 0.01   |
| 11                                    | T3    | -4264.29   | 0.76 (1621)                                               | 1.97                | 1.00   | 0.98   | 1.97 | 0.02 | 0.00   |
| 12                                    | Q1    | -4260.6    | 4.46 (278)                                                | 1.97                | 0.98   | 0.98   | 0.98 | 0.48 | 0.51   |
| 13                                    | Q2    | -4259.3    | 5.76 (215)                                                | 2.00                | 1.00   | 1.00   | 1.00 | 0.52 | 0.48   |
| 14                                    | T4    | -4258.98   | 6.07 (204)                                                | 1.98                | 0.99   | 0.99   | 0.99 | 0.63 | 0.37   |
| 15                                    | T5    | -4258.89   | 6.17 (201)                                                | 1.96                | 0.98   | 1.82   | 0.14 | 0.33 | 0.68   |
| 16                                    | T6    | -4258.71   | 6.34 (196)                                                | 1.97                | 1.79   | 0.98   | 0.19 | 0.35 | 0.66   |

**Table S6.** Energies and orbital populations of  $\text{OsCl}_5(\text{H}_2\text{O})^-$  and  $\text{OsCl}_5(\text{OH})^{2-}$  in quintet state as a result of CASSCF(6,6)/IMCP-SR1 aqueous phase calculations (GAMESS-US package).

|                                                         | State | Energy, eV | Delta Energy of transition $Q1 \rightarrow Q_i$ , eV (nm) | Orbitals population |        |        |        |      |      |
|---------------------------------------------------------|-------|------------|-----------------------------------------------------------|---------------------|--------|--------|--------|------|------|
|                                                         |       |            |                                                           | HOMO-4              | HOMO-3 | HOMO-2 | HOMO-1 | HOMO | LUMO |
|                                                         |       |            |                                                           | A                   | A      | A      | A      | A    | A    |
| <b><math>\text{OsCl}_5(\text{H}_2\text{O})^-</math></b> |       |            |                                                           |                     |        |        |        |      |      |
| 1                                                       | Q1    | -4277.12   | 0                                                         | 1.66                | 0.37   | 0.98   | 0.88   | 0.98 | 1.04 |
| 2                                                       | Q2    | -4273.45   | 3.67 (338)                                                | 1.75                | 1.08   | 1.00   | 0.75   | 0.25 | 1.10 |
| 3                                                       | Q3    | -4272.47   | 4.65 (267)                                                | 1.60                | 1.09   | 0.88   | 0.99   | 0.99 | 0.39 |
| 4                                                       | Q4    | -4272.03   | 5.09 (243)                                                | 1.68                | 1.03   | 0.67   | 0.64   | 0.86 | 1.07 |
| 5                                                       | Q5    | -4272.01   | 5.11 (242)                                                | 1.63                | 1.00   | 0.58   | 0.80   | 0.92 | 1.05 |
| 6                                                       | Q6    | -4271.42   | 5.71 (217)                                                | 1.00                | 1.00   | 1.00   | 1.00   | 1.00 | 1.00 |
| 7                                                       | Sp1   | -4271.21   | 5.91 (210)                                                | 1.11                | 0.19   | 1.09   | 0.88   | 0.98 | 1.67 |
| 8                                                       | Q7    | -4270.48   | 6.64 (187)                                                | 1.08                | 0.33   | 1.42   | 1.07   | 1.02 | 1.01 |
| <b><math>\text{OsCl}_5(\text{OH})^{2-}</math></b>       |       |            |                                                           |                     |        |        |        |      |      |
| 9                                                       | Q1    | -4264.5    | 0                                                         | 2.00                | 1.00   | 1.00   | 1.00   | 1.00 | 0.00 |
| 10                                                      | Q2    | -4257.37   | 7.13 (174)                                                | 1.00                | 1.98   | 1.00   | 1.00   | 1.00 | 0.01 |
| 11                                                      | Q3    | -4257.17   | 7.32 (169.3)                                              | 0.99                | 0.99   | 1.39   | 1.58   | 1.00 | 0.01 |
| 12                                                      | Q4    | -4257.16   | 7.34 (169.0)                                              | 1.00                | 1.01   | 1.55   | 1.41   | 1.01 | 0.01 |
| 13                                                      | Q5    | -4257.02   | 7.47 (166)                                                | 1.00                | 1.00   | 1.01   | 1.00   | 1.97 | 0.01 |
| 14                                                      | Q6    | -4246.52   | 17.97 (69)                                                | 1.98                | 1.00   | 0.99   | 1.00   | 0.01 | 1.00 |
| 15                                                      | Q7    | -4244.64   | 19.85 (62.5)                                              | 1.41                | 0.89   | 0.71   | 0.95   | 0.99 | 0.99 |
| 16                                                      | Sp1   | -4244.53   | 19.96 (62.1)                                              | 1.00                | 1.00   | 1.00   | 1.00   | 1.00 | 1.00 |



**Table S7.** Energies and orbital populations of  $\text{OsCl}_5(\text{H}_2\text{O})^-$  and  $\text{OsCl}_5(\text{OH})^{2-}$  in triplet state as a result of SBKJC gas phase calculations (FireFly package).

|                                                         | State | Energy, eV | Energy of transition $1 \rightarrow i$ , eV (nm) | XMC-QDPT2 | XMC-QDPT2 energy of transition $1 \rightarrow i$ , eV (nm) | f        | Orbitals population |        |        |        |      |      |        |        |        |        |
|---------------------------------------------------------|-------|------------|--------------------------------------------------|-----------|------------------------------------------------------------|----------|---------------------|--------|--------|--------|------|------|--------|--------|--------|--------|
|                                                         |       |            |                                                  |           |                                                            |          | HOMO-4              | HOMO-3 | HOMO-2 | HOMO-1 | HOMO | LUMO | LUMO+1 | LUMO+2 | LUMO+3 | LUMO+4 |
|                                                         |       |            |                                                  |           |                                                            |          | A                   | A      | A      | A      | A    | A    | A      | A      | A      | A      |
| <b><math>\text{OsCl}_5(\text{H}_2\text{O})^-</math></b> |       |            |                                                  |           |                                                            |          |                     |        |        |        |      |      |        |        |        |        |
| 1                                                       | T1    | -4922.65   | 0                                                | -4934.74  | 0                                                          | -        | 2.0                 | 1.98   | 1.97   | 1.01   | 1.00 | 0.02 | 0.01   | 0.01   | 0.01   | 0      |
| 2                                                       | T2    | -4916.96   | 5.69 (218)                                       | -4934.67  | 0.07 (17714)                                               | 1.32E-6  | 2.0                 | 1.99   | 1.98   | 1.00   | 1.00 | 0.01 | 0.07   | 0.01   | 0      | 0      |
| 3                                                       | T3    | -4916.78   | 5.87 (211)                                       | -4934.6   | 0.14 (8857)                                                | 0.00029  | 2.0                 | 1.98   | 1.97   | 1.01   | 1.01 | 0.01 | 0.01   | 0.01   | 0      | 0      |
| 4                                                       | T4    | -4916.36   | 6.29 (197)                                       | -4934.5   | 0.24 (5167)                                                | 1.29E-5  | 2.0                 | 1.95   | 1.94   | 1.04   | 1.02 | 0.03 | 0.01   | 0.01   | 0.01   | 0      |
| 5                                                       | T5    | -4916.08   | 6.57 (189)                                       | -4934.37  | 0.37 (3351)                                                | 0.00094  | 2.0                 | 1.97   | 1.96   | 1.01   | 1.01 | 0.03 | 0.02   | 0.01   | 0.01   | 0      |
| 6                                                       | T6    | -4915.39   | 7.26 (171)                                       | -4933.57  | 1.17 (1060)                                                | 3.397E-5 | 2.0                 | 1.96   | 1.96   | 1.02   | 1.00 | 0.04 | 0.01   | 0.01   | 0.01   | 0      |
| 7                                                       | T7    | -4915.13   | 7.52 (165)                                       | -4932.11  | 2.63 (471)                                                 | 0.00011  | 2.0                 | 1.99   | 1.03   | 1.00   | 0.97 | 0.91 | 0.09   | 0      | 0      | 0      |
| 8                                                       | T8    | -4914.44   | 8.21 (151)                                       | -4932.05  | 2.69 (461)                                                 | 9.79E-5  | 1.99                | 1.97   | 1.65   | 1.00   | 0.88 | 0.38 | 0.12   | 0.01   | 0      | 0      |
| 9                                                       | T9    | -4914.16   | 8.49 (146)                                       | -4932.03  | 2.71 (458)                                                 | 2.65E-6  | 2.0                 | 1.99   | 1.10   | 1.01   | 0.89 | 0.70 | 0.30   | 0      | 0      | 0      |
| 10                                                      | Q1    | -4913.39   | 9.26 (134)                                       | -4931.98  | 2.76 (449)                                                 | 9.63E-6  | 1.99                | 1.97   | 1.82   | 0.99   | 0.95 | 0.22 | 0.06   | 0      | 0      | 0      |
| 11                                                      | T10   | -4913.27   | 9.38 (132)                                       | -4931.93  | 2.81 (441)                                                 | 4.00E-5  | 2.0                 | 1.99   | 1.29   | 0.97   | 0.88 | 0.74 | 0.13   | 0      | 0      | 0      |
| 12                                                      | Q2    | -4912.78   | 9.87 (126)                                       | -4931.91  | 2.83 (438)                                                 | 0.00014  | 2.0                 | 1.9    | 1.14   | 0.95   | 0.91 | 0.84 | 0.16   | 0      | 0      | 0      |
| 13                                                      | T11   | -4912.76   | 9.89 (125)                                       | -4931.9   | 2.84 (437)                                                 | 4.92E-5  | 2.0                 | 1.99   | 1.42   | 1.01   | 0.86 | 0.57 | 0.14   | 0      | 0      | 0      |
| 14                                                      | T12   | -4912.46   | 10.19 (122)                                      | -4931.88  | 2.87 (432)                                                 | 5.295E-6 | 2.0                 | 1.99   | 1.59   | 0.99   | 0.95 | 0.42 | 0.06   | 0      | 0      | 0      |
| 15                                                      | T13   | -4912.05   | 10.6 (117)                                       | -4931.79  | 2.95 (420)                                                 | 6.355E-5 | 1.99                | 1.99   | 1.09   | 0.98   | 0.93 | 0.63 | 0.37   | 0      | 0      | 0      |
| 16                                                      | Q3    | -4912.01   | 10.64 (117)                                      | -4931.78  | 2.97 (418)                                                 | 0.00018  | 2.0                 | 1.99   | 1.10   | 0.99   | 0.91 | 0.77 | 0.23   | 0.00   | 0      | 0      |
| 17                                                      | T14   | -4911.94   | 10.71(116)                                       | -4931.63  | 3.11 (399)                                                 | 0.00028  | 1.99                | 1.98   | 1.07   | 0.99   | 0.95 | 0.86 | 0.15   | 0.00   | 0      | 0      |
| 18                                                      | T15   | -4911.88   | 10.77 (115)                                      | -4931.49  | 3.25 (382)                                                 | 5.02E-5  | 1.99                | 1.99   | 1.05   | 1.02   | 0.97 | 0.92 | 0.05   | 0.00   | 0      | 0      |
| 19                                                      | T16   | -4911.83   | 10.82 (114.60)                                   | -4931.35  | 3.39 (366)                                                 | 0.00014  | 1.95                | 1.87   | 1.69   | 0.99   | 0.86 | 0.46 | 0.18   | 0.01   | 0      | 0      |
| 20                                                      | Q4    | -4911.81   | 10.84 (114.39)                                   | -4931.22  | 3.52 (352)                                                 | 0.00030  | 1.96                | 1.83   | 1.54   | 0.99   | 0.77 | 0.64 | 0.27   | 0.01   | 0      | 0      |
| 21                                                      | T17   | -4911.74   | 10.91 (114)                                      | -4931.03  | 3.7 (335)                                                  | 0.00071  | 1.99                | 1.97   | 1.53   | 0.93   | 0.86 | 0.49 | 0.22   | 0      | 0      | 0      |
| 22                                                      | T18   | -4911.48   | 11.17 (111)                                      | -4930.82  | 3.92 (316)                                                 | 1.31E-6  | 1.99                | 1.98   | 1.72   | 0.93   | 0.93 | 0.31 | 0.14   | 0      | 0      | 0      |
| <b><math>\text{OsCl}_5(\text{OH})^{2-}</math></b>       |       |            |                                                  |           |                                                            |          |                     |        |        |        |      |      |        |        |        |        |
| 1                                                       | T1    | -4905.69   | 0                                                | -4920.92  | 0                                                          | -        | 1.97                | 1.85   | 1.77   | 1.15   | 1.01 | 0.21 | 0.02   | 0.01   | 0.01   | 0.01   |
| 2                                                       | T2    | -4899.26   | 6.43 (193)                                       | -4918.32  | 2.61 (476)                                                 | 0.00078  | 1.99                | 1.97   | 1.94   | 1.03   | 1.00 | 0.06 | 0.03   | 0      | 0      | 0      |
| 3                                                       | T3    | -4899.18   | 6.51 (191)                                       | -4917.92  | 3.00 (413)                                                 | 0.0006   | 1.99                | 1.97   | 1.96   | 1.01   | 1.00 | 0.03 | 0.03   | 0.01   | 0      | 0      |
| 4                                                       | T4    | -4899.12   | 6.57 (189)                                       | -4917.49  | 3.44 (361)                                                 | 0.032    | 1.96                | 1.94   | 1.88   | 1.07   | 1.02 | 0.07 | 0.05   | 0.01   | 0      | 0.37   |

|    |     |          |            |          |              |         |       |        |      |      |      |        |      |      |      |      |
|----|-----|----------|------------|----------|--------------|---------|-------|--------|------|------|------|--------|------|------|------|------|
| 5  | T5  | -4898.9  | 6.79 (183) | -4915.73 | 5.19 (239)   | 0.00024 | 1.97  | 1.96   | 1.17 | 1.01 | 0.96 | 0.85   | 0.07 | 0.01 | 0    | 0    |
| 6  | T6  | -4898.85 | 6.83 (181) | -4915.67 | 5.25 (236)   | 0.0016  | 1.97  | 1.96   | 1.79 | 1.02 | 0.96 | 0.25   | 0.04 | 0.01 | 0.01 | 0    |
| 7  | T7  | -4898.8  | 6.89 (180) | -4915.54 | 5.38 (230)   | 0.00064 | 1.97  | 1.95   | 1.34 | 1.05 | 0.84 | 0.76   | 0.09 | 0.01 | 0    | 0    |
| 8  | Q1  | -4898.16 | 7.52 (165) | -4915.32 | 5.61 (221)   | 0.0027  | 1.97  | 1.97   | 1.43 | 1.08 | 0.83 | 0.53   | 0.17 | 0.01 | 0    | 0    |
| 9  | T8  | -4897.82 | 7.87 (158) | -4915.27 | 5.66 (219.1) | 1.18E-5 | 1.98  | 1.97   | 1.36 | 0.90 | 0.80 | 0.75   | 0.23 | 0.01 | 0    | 0    |
| 10 | T9  | -4897.79 | 7.90 (157) | -4915.26 | 5.67 (218.7) | 0.0005  | 1.97  | 1.97   | 1.39 | 1.04 | 0.62 | 0.59   | 0.40 | 0.01 | 0    | 0    |
| 11 | Q2  | -4897.68 | 8.00 (155) | -4915.08 | 5.85 (212)   | 0.00092 | 1.97  | 1.96   | 1.04 | 1.01 | 0.99 | 0.94   | 0.06 | 0.01 | 0    | 0    |
| 12 | T10 | -4897.54 | 8.14 (152) | -4914.89 | 6.03 (206)   | 0.00034 | 1.97  | 1.92   | 1.53 | 0.90 | 0.82 | 0.66   | 0.18 | 0.01 | 0    | 0    |
| 13 | T11 | -4897.4  | 8.29 (150) | -4914.84 | 6.08 (204)   | 0.0021  | 1.97  | 1.95   | 1.53 | 1.00 | 0.72 | 0.52   | 0.29 | 0.01 | 0    | 0    |
| 14 | T12 | -4897.12 | 8.57 (145) | -4914.74 | 6.19 (200)   | 0.0067  | 1.97  | 1.90   | 1.50 | 0.99 | 0.79 | 0.66   | 0.17 | 0.01 | 0    | 0    |
| 15 | T13 | -4896.69 | 9.00 (138) | -4914.7  | 6.22 (199)   | 0.0045  | 1.982 | 1.9    | 1.36 | 1.09 | 0.84 | 0.58   | 0.16 | 0.01 | 0    | 00   |
| 16 | T14 | -4896.5  | 9.19 (135) | -4914.51 | 6.42 (193)   | 0.006   | 1.968 | 1.83   | 1.3  | 1.15 | 0.83 | 0.58   | 0.32 | 0.01 | 0    | 0    |
| 17 | T15 | -4896.44 | 9.25 (134) | -4914.44 | 6.48 (191)   | 0.0054  | 1.97  | 1.8924 | 1.44 | 1.05 | 0.72 | 0.66   | 0.26 | 0.01 | 0    | 0    |
| 18 | Q3  | -4896.3  | 9.39 (132) | -4914.22 | 6.70 (185)   | 0.018   | 1.98  | 1.8379 | 1.18 | 1.10 | 0.99 | 0.82   | 0.07 | 0.01 | 0    | 0    |
| 19 | T16 | -4896.16 | 9.53 (130) | -4914.13 | 6.79 (183)   | 0.0003  | 1.98  | 1.9627 | 1.31 | 0.98 | 0.95 | 0.68   | 0.13 | 0.01 | 0    | 0    |
| 20 | T17 | -4896    | 9.68 (128) | -4913.42 | 7.51 (165)   | 0.0057  | 1.97  | 1.9310 | 1.21 | 1.00 | 0.89 | 0.74   | 0.25 | 0.01 | 0    | 0    |
| 21 | T18 | -4895.96 | 9.72 (128) | -4913.37 | 7.55 (164)   | 0.0013  | 1.97  | 1.93   | 1.61 | 0.91 | 0.89 | 0.5071 | 0.17 | 0.01 | 0    | 0    |
| 22 | T19 | -4895.8  | 9.88 (125) | -4907.9  | 13.02 (95)   | 0.063   | 1.96  | 1.62   | 1.57 | 1.38 | 1.00 | 0.4401 | 0.02 | 0.01 | 0.01 | 0.01 |

**Table S8.** Energies and orbital populations of  $\text{OsCl}_5(\text{H}_2\text{O})^-$  and  $\text{OsCl}_5(\text{OH})^{2-}$  in triplet state as a result of SBKJC aqueous phase calculations (FireFly package).

|                                                         | State | Energy, eV | Energy of transition<br>T1→Ti,<br>Q1→Qi<br>eV (nm) | XMC-<br>QDPT2 | XMC-QDPT2<br>energy of<br>transition 1→i,<br>eV (nm) | f        | Orbitals population |        |        |        |      |      |        |        |        |        |
|---------------------------------------------------------|-------|------------|----------------------------------------------------|---------------|------------------------------------------------------|----------|---------------------|--------|--------|--------|------|------|--------|--------|--------|--------|
|                                                         |       |            |                                                    |               |                                                      |          | HOMO-4              | HOMO-3 | HOMO-2 | HOMO-1 | HOMO | LUMO | LUMO+1 | LUMO+2 | LUMO+3 | LUMO+4 |
|                                                         |       |            |                                                    |               |                                                      |          | A                   | A      | A      | A      | A    | A    | A      | A      | A      | A      |
| <b><math>\text{OsCl}_5(\text{H}_2\text{O})^-</math></b> |       |            |                                                    |               |                                                      |          |                     |        |        |        |      |      |        |        |        |        |
| 1                                                       | T1    | -4925.38   | 0                                                  | -4937.59      | 0                                                    | -        | 1.99                | 1.99   | 1.97   | 1.01   | 0.99 | 0.03 | 0.02   | 0      | 0      | 0      |
| 2                                                       | T2    | -4925.04   | 0.35 (3543)                                        | -4937.35      | 0.24 (5157)                                          | 2.02E-6  | 1.99                | 1.99   | 1.97   | 1.01   | 1.00 | 0.02 | 0.02   | 0      | 0      | 0      |
| 3                                                       | T3    | -4924.94   | 0.44 (2818)                                        | -4937.22      | 0.38 (3290)                                          | 5.58E-6  | 2.00                | 1.99   | 1.97   | 1.00   | 1.00 | 0.02 | 0.01   | 0      | 0      | 0      |
| 4                                                       | Q1    | -4924.52   | -                                                  | -4935.47      | -                                                    | 0.0027   | 2.00                | 1.99   | 1.19   | 1.00   | 1.00 | 0.80 | 0.02   | 0      | 0      | 0      |
| 5                                                       | T4    | -4922.63   | 2.76 (449)                                         | -4934.91      | 2.68 (462)                                           | 2.37E-5  | 1.99                | 1.99   | 1.17   | 1.00   | 0.95 | 0.83 | 0.07   | 0      | 0      | 0      |
| 6                                                       | T5    | -4922.31   | 3.07 (404)                                         | -4934.84      | 2.76 (449)                                           | 6.68E-5  | 1.99                | 1.99   | 1.33   | 1.02   | 0.94 | 0.65 | 0.08   | 0      | 0      | 0      |
| 7                                                       | T6    | -4922.17   | 3.21 (386)                                         | -4934.78      | 2.82 (440)                                           | 7.96E-5  | 1.99                | 1.99   | 1.36   | 1.00   | 0.99 | 0.64 | 0.02   | 0      | 0      | 0      |
| 8                                                       | T7    | -4922.14   | 3.24 (383)                                         | -4934.76      | 2.84 (437)                                           | 3.99E-5  | 1.99                | 1.99   | 1.14   | 0.99   | 0.88 | 0.86 | 0.14   | 0      | 0      | 0      |
| 9                                                       | T8    | -4922.09   | 3.29 (377)                                         | -4934.73      | 2.87 (433)                                           | 0.00059  | 1.99                | 1.99   | 1.04   | 0.99   | 0.97 | 0.96 | 0.05   | 0      | 0      | 0      |
| 10                                                      | T9    | -4922.07   | 3.32 (373)                                         | -4934.33      | 3.26 (380)                                           | 0.00013  | 1.99                | 1.99   | 1.29   | 1.00   | 0.70 | 0.68 | 0.33   | 0      | 0      | 0      |
| 11                                                      | T10   | -4920.82   | 4.57 (271)                                         | -4934.29      | 3.30 (376)                                           | 0.00079  | 1.99                | 1.99   | 1.11   | 1.00   | 0.89 | 0.83 | 0.18   | 0      | 0      | 0      |
| 12                                                      | T11   | -4920.71   | 4.68 (265)                                         | -4934.25      | 3.35 (370)                                           | 1.44E-5  | 1.99                | 1.99   | 1.44   | 1.02   | 0.69 | 0.53 | 0.33   | 0      | 0      | 0      |
| 13                                                      | T12   | -4920.61   | 4.77 (260)                                         | -4934.17      | 3.42 (362)                                           | 7.60E-6  | 1.99                | 1.99   | 1.67   | 1.01   | 0.85 | 0.31 | 0.17   | 0      | 0      | 0      |
| 14                                                      | Q2    | -4919.69   | 4.83 (257)                                         | -4933.84      | 1.63 (761)                                           | 9.04E-5  | 1.99                | 1.99   | 1.22   | 1.00   | 0.82 | 0.76 | 0.21   | 0      | 0      | 0      |
| 15                                                      | T13   | -4919.65   | 5.73 (216)                                         | -4933.79      | 3.80 (326)                                           | 0.00019  | 1.99                | 1.99   | 1.35   | 0.97   | 0.72 | 0.64 | 0.34   | 0      | 0      | 0      |
| 16                                                      | T14   | -4919.44   | 5.94 (209)                                         | -4933.67      | 3.92 (316.2)                                         | 0.00040  | 1.99                | 1.99   | 1.33   | 0.97   | 0.89 | 0.64 | 0.19   | 0      | 0      | 0      |
| 17                                                      | T15   | -4919.39   | 5.99 (207)                                         | -4933.67      | 3.93 (315.8)                                         | 0.0021   | 1.99                | 1.99   | 1.03   | 0.99   | 0.97 | 0.96 | 0.04   | 0      | 0      | 0      |
| 18                                                      | T16   | -4919.32   | 6.07 (204)                                         | -4933.49      | 4.10 (302)                                           | 0.00014  | 1.99                | 1.99   | 1.61   | 0.93   | 0.87 | 0.38 | 0.22   | 0      | 0      | 0      |
| 19                                                      | T17   | -4919.28   | 6.10 (203)                                         | -4932.96      | 4.64 (267)                                           | 9.24E-5  | 1.99                | 1.99   | 1.38   | 0.93   | 0.87 | 0.60 | 0.23   | 0      | 0      | 0      |
| 20                                                      | T18   | -4919.23   | 6.15 (202)                                         | -4932.75      | 4.85 (256)                                           | 7.541E-5 | 1.99                | 1.99   | 1.85   | 1.01   | 0.99 | 0.13 | 0.03   | 0      | 0      | 0      |
| 21                                                      | Q3    | -4918.92   | 5.6 (221)                                          | -4932.48      | 2.99 (415)                                           | 1.17E-5  | 1.99                | 1.99   | 1.44   | 0.90   | 0.60 | 0.54 | 0.52   | 0      | 0      | 0      |
| 22                                                      | Q4    | -4918.86   | 5.66 (219)                                         | -4932.21      | 3.26 (380)                                           | 3.16E-6  | 1.99                | 1.99   | 1.61   | 0.97   | 0.71 | 0.37 | 0.35   | 0      | 0      | 0      |
| <b><math>\text{OsCl}_5(\text{OH})^{2-}</math></b>       |       |            |                                                    |               |                                                      |          |                     |        |        |        |      |      |        |        |        |        |
| 1                                                       | T1    | -4914.53   | 0                                                  | -4918.25      | 0                                                    | -        | 1.99                | 1.96   | 1.94   | 1.02   | 0.98 | 0.07 | 0.04   | 0.01   | 0      | 0      |
| 2                                                       | T2    | -4909.88   | 4.65 (267)                                         | -4917.9       | 0.35 (3517)                                          | 0.00027  | 1.97                | 1.94   | 1.88   | 1.03   | 0.93 | 0.17 | 0.07   | 0.01   | 0.01   | 0      |
| 3                                                       | T3    | -4909.75   | 4.78 (259)                                         | -4916         | 2.26 (550)                                           | 0.00017  | 1.99                | 1.98   | 1.98   | 1.00   | 1.00 | 0.02 | 0.01   | 0.00   | 0      | 00     |
| 4                                                       | T4    | -4908.64   | 5.89 (210)                                         | -4914.71      | 3.54 (350)                                           | 0.0059   | 1.94                | 1.93   | 1.85   | 0.98   | 0.90 | 0.26 | 0.13   | 0.00   | 0.01   | 0      |

|    |     |          |              |          |             |          |      |      |      |      |      |      |      |      |      |   |
|----|-----|----------|--------------|----------|-------------|----------|------|------|------|------|------|------|------|------|------|---|
| 5  | T5  | -4908.51 | 6.02 (206)   | -4914.59 | 3.66 (339)  | 0.00399  | 1.97 | 1.94 | 1.75 | 0.96 | 0.87 | 0.33 | 0.16 | 0.00 | 0.01 | 0 |
| 6  | T6  | -4908.3  | 6.23 (199)   | -4914.29 | 3.97 (313)  | 0.017    | 1.96 | 1.71 | 1.61 | 1.30 | 0.92 | 0.39 | 0.09 | 0.01 | 0.01 | 0 |
| 7  | T7  | -4908.27 | 6.26 (198)   | -4914.12 | 4.13 (300)  | 0.0034   | 1.94 | 1.86 | 1.59 | 1.23 | 0.69 | 0.50 | 0.16 | 0.01 | 0.01 | 0 |
| 8  | T8  | -4908.03 | 6.50 (190.9) | -4913.99 | 4.26 (291)  | 0.014    | 1.99 | 1.95 | 1.80 | 1.01 | 0.88 | 0.33 | 0.03 | 0.01 | 0.01 | 0 |
| 9  | T9  | -4908.02 | 6.51 (190.6) | -4913.53 | 4.73 (262)  | 0.00021  | 2.00 | 1.99 | 1.97 | 1.01 | 1.00 | 0.02 | 0.01 | 0    | 0    | 0 |
| 10 | Q1  | -4906.93 | -            | -4913.39 | -           | 0.0564   | 2.00 | 1.71 | 1.67 | 1.31 | 1.26 | 0.05 | 0.02 | 0.01 | 0.01 | 0 |
| 11 | Q2  | -4906.56 | 0.37 (3351)  | -4912.45 | 0.94 (1319) | 0.0076   | 2.00 | 1.95 | 1.90 | 1.07 | 1.01 | 0.06 | 0.02 | 0    | 0    | 0 |
| 12 | T10 | -4906.01 | 8.52 (146)   | -4912.14 | 6.12 (203)  | 0.01669  | 2.00 | 1.94 | 1.29 | 0.96 | 0.84 | 0.82 | 0.18 | 0.01 | 0    | 0 |
| 13 | T11 | -4905.85 | 8.68 (143)   | -4911.89 | 6.36 (195)  | 0.00598  | 2.00 | 1.75 | 1.31 | 1.17 | 1.03 | 0.66 | 0.14 | 0.01 | 0    | 0 |
| 14 | Q3  | -4905.79 | 1.14 (1088)  | -4911.74 | 1.65 (752)  | 0.0082   | 2.00 | 1.72 | 1.56 | 1.31 | 1.00 | 0.32 | 0.09 | 0.01 | 0    | 0 |
| 15 | T12 | -4905.73 | 8.80 (141)   | -4911.52 | 6.73 (184)  | 0.00046  | 2.00 | 1.92 | 1.24 | 1.12 | 0.89 | 0.76 | 0.09 | 0.01 | 0    | 0 |
| 16 | T13 | -4905.46 | 9.07 (137)   | -4910.85 | 7.40 (168)  | 0.0043   | 2.00 | 1.95 | 1.07 | 1.02 | 0.99 | 0.83 | 0.14 | 0.01 | 0    | 0 |
| 17 | T14 | -4905.09 | 9.43 (131)   | -4910.7  | 7.56 (164)  | 0.00819  | 2.00 | 1.93 | 1.20 | 1.07 | 0.83 | 0.66 | 0.32 | 0.01 | 0    | 0 |
| 18 | T15 | -4904.98 | 9.55 (130)   | -4910.59 | 7.66 (162)  | 0.00171  | 2.00 | 1.94 | 1.14 | 1.12 | 0.80 | 0.77 | 0.24 | 0.01 | 0    | 0 |
| 19 | T16 | -4904.89 | 9.64 (129)   | -4910.5  | 7.75 (160)  | 0.03042  | 2.00 | 1.88 | 1.30 | 1.09 | 0.95 | 0.65 | 0.17 | 0.01 | 0    | 0 |
| 20 | T17 | -4904.8  | 9.73 (127)   | -4910.05 | 8.21 (151)  | 0.003105 | 2.00 | 1.96 | 1.05 | 1.02 | 0.98 | 0.97 | 0.03 | 0    | 0    | 0 |
| 21 | T18 | -4904.4  | 10.12 (122)  | -4909.4  | 8.86 (140)  | 0.007593 | 2.00 | 1.94 | 1.29 | 1.02 | 0.86 | 0.72 | 0.17 | 0.01 | 0    | 0 |
| 22 | T19 | -4904.05 | 10.48 (118)  | -4899.16 | 19.10 (65)  | 0.24251  | 2.00 | 1.90 | 1.40 | 1.10 | 0.98 | 0.59 | 0.04 | 0.01 | 0    | 0 |

**Table S9.** Energies and orbital populations of  $\text{OsCl}_5(\text{H}_2\text{O})^-$  and  $\text{OsCl}_5(\text{OH})^{2-}$  in quintet state as a result of SBKJC gas phase calculations (FireFly package).

|                                                         | State | Energy, eV | Energy of transition $1 \rightarrow i$ , eV (nm) | XMC-QDPT2 | XMC-QDPT2 energy of transition $1 \rightarrow i$ , eV (nm) | f       | Orbitals population |        |        |        |        |      |      |        |        |        |
|---------------------------------------------------------|-------|------------|--------------------------------------------------|-----------|------------------------------------------------------------|---------|---------------------|--------|--------|--------|--------|------|------|--------|--------|--------|
|                                                         |       |            |                                                  |           |                                                            |         | HOMO-5              | HOMO-4 | HOMO-3 | HOMO-2 | HOMO-1 | HOMO | LUMO | LUMO+1 | LUMO+2 | LUMO+3 |
|                                                         |       |            |                                                  |           |                                                            |         | A                   | A      | A      | A      | A      | A    | A    | A      | A      | A      |
| <b><math>\text{OsCl}_5(\text{H}_2\text{O})^-</math></b> |       |            |                                                  |           |                                                            |         |                     |        |        |        |        |      |      |        |        |        |
| 1                                                       | Q1    | -4922.63   | 0                                                | -4935.35  | 0                                                          | -       | 1.99                | 1.99   | 1.00   | 1.00   | 1.00   | 1.00 | 0.01 | 0.01   | 0      | 0      |
| 2                                                       | Q2    | -4918.81   | 3.82 (325)                                       | -4932.38  | 2.97 (418)                                                 | 9.06E-5 | 1.97                | 1.94   | 1.03   | 1.00   | 1.00   | 0.96 | 0.08 | 0.01   | 0      | 0      |
| 3                                                       | Q3    | -4917.38   | 5.25 (236)                                       | -4932.17  | 3.19 (389)                                                 | 0.019   | 1.78                | 1.65   | 1.23   | 1.18   | 1.00   | 0.93 | 0.22 | 0.01   | 0      | 0      |
| 4                                                       | Q4    | -4917.37   | 5.26 (236)                                       | -4932.05  | 3.30 (376)                                                 | 0.036   | 1.89                | 1.57   | 1.09   | 1.04   | 1.00   | 0.80 | 0.59 | 0.01   | 0      | 0      |
| 5                                                       | Sp1   | -4917.36   | -                                                | -4931.79  | -                                                          | 0.028   | 1.92                | 1.77   | 1.16   | 1.05   | 1.00   | 0.91 | 0.17 | 0.01   | 0      | 0      |
| 6                                                       | Q5    | -4917.36   | 5.28 (234.9)                                     | -4931.69  | 3.66 (339)                                                 | 0.0021  | 2.00                | 1.97   | 1.00   | 1.00   | 1.00   | 1.00 | 0.02 | 0      | 0      | 0      |
| 7                                                       | Sp2   | -4917.33   | 5.3 (234)                                        | -4931.67  | 3.68 (337)                                                 | 0.0071  | 1.95                | 1.91   | 1.07   | 1.04   | 1.00   | 0.98 | 0.05 | 0.01   | 0      | 0      |
| 8                                                       | Q6    | -4917.07   | 5.56 (223)                                       | -4931.62  | 3.73 (332)                                                 | 0.0032  | 1.93                | 1.90   | 1.08   | 1.05   | 1.00   | 0.98 | 0.04 | 0.01   | 0      | 0      |
| 9                                                       | Q7    | -4917      | 5.63 (220)                                       | -4931.45  | 3.90 (318)                                                 | 0.014   | 1.87                | 1.85   | 1.12   | 1.10   | 1.01   | 1.00 | 0.03 | 0.01   | 0      | 0      |
| 10                                                      | Q8    | -4916.89   | 5.75 (216)                                       | -4931.13  | 4.22 (294)                                                 | 0.016   | 1.86                | 1.52   | 1.13   | 1.00   | 1.00   | 0.85 | 0.62 | 0.01   | 0      | 0      |
| 11                                                      | Q9    | -4916.86   | 5.78 (215)                                       | -4930.88  | 4.47 (277)                                                 | 0.0031  | 1.99                | 1.96   | 1.01   | 1.00   | 1.00   | 1.00 | 0.04 | 0.01   | 0      | 0      |
| 12                                                      | Q10   | -4916.84   | 5.8 (214)                                        | -4930.70  | 4.65 (267)                                                 | 0.0040  | 1.88                | 1.80   | 1.12   | 1.00   | 1.00   | 0.99 | 0.20 | 0.01   | 0      | 0      |
| 13                                                      | Q11   | -4916.82   | 5.81 (213.4)                                     | -4930.20  | 5.15 (241)                                                 | 0.00045 | 1.98                | 1.86   | 1.01   | 1.00   | 1.00   | 0.99 | 0.15 | 0.01   | 0      | 0      |
| 14                                                      | Q12   | -4916.81   | 5.82 (213.1)                                     | -4929.51  | 5.84 (212)                                                 | 0.00042 | 1.96                | 1.26   | 1.03   | 1.01   | 1.00   | 0.97 | 0.76 | 0.01   | 0      | 0      |
| 15                                                      | Q13   | -4916.81   | 5.82 (213.1)                                     | -4928.94  | 6.41 (193)                                                 | 0.0057  | 1.93                | 1.26   | 1.03   | 1.01   | 0.99   | 0.97 | 0.80 | 0      | 0      | 0      |
| 16                                                      | Q14   | -4916.78   | 5.86 (212)                                       | -4928.75  | 6.60 (188)                                                 | 0.0037  | 2.00                | 1.02   | 1.01   | 1.00   | 1.00   | 0.99 | 0.98 | 0      | 0      | 0      |
| 17                                                      | Q15   | -4916.65   | 5.98 (207)                                       | -4928.66  | 6.70 (185)                                                 | 0.0020  | 1.98                | 1.64   | 1.13   | 1.02   | 1.00   | 0.88 | 0.35 | 0      | 0      | 0      |
| 18                                                      | Q16   | -4915.6    | 7.03 (176)                                       | -4928.58  | 6.77 (183)                                                 | 0.00013 | 2.00                | 1.70   | 1.01   | 1.00   | 1.00   | 0.99 | 0.30 | 0      | 0      | 0      |
| 19                                                      | Q17   | -4915.57   | 7.06 (176)                                       | -4928.45  | 6.90 (180)                                                 | 0.00019 | 2.00                | 1.21   | 1.01   | 1.00   | 1.00   | 0.98 | 0.80 | 0      | 0      | 0      |
| 20                                                      | Q18   | -4915.06   | 7.57 (164)                                       | -4928.38  | 6.97 (178)                                                 | 0.00018 | 1.99                | 1.19   | 1.03   | 1.00   | 0.99   | 0.98 | 0.81 | 0      | 0      | 0      |
| 21                                                      | Q19   | -4915.03   | 7.6 (163)                                        | -4928.36  | 6.99 (177)                                                 | 0.00041 | 1.99                | 1.41   | 1.03   | 1.01   | 1.00   | 0.96 | 0.59 | 0      | 0      | 0      |
| 22                                                      | Q20   | -4914.83   | 7.8 (325)                                        | -4927.80  | 7.55 (164)                                                 | 0.0013  | 1.98                | 1.15   | 1.02   | 1.01   | 0.99   | 0.99 | 0.84 | 0      | 0      | 0      |
| <b><math>\text{OsCl}_5(\text{OH})^{2-}</math></b>       |       |            |                                                  |           |                                                            |         |                     |        |        |        |        |      |      |        |        |        |
| 1                                                       | Q1    | -4906.37   | 0                                                | -4919.13  | 0.00                                                       | -       | 1.94                | 1.55   | 1.24   | 1.02   | 0.99   | 0.83 | 0.40 | 0.01   | 0.01   | 0      |
| 2                                                       | Q2    | -4900.1    | 6.27 (198)                                       | -4917.70  | 1.43 (867)                                                 | 0.0046  | 1.98                | 1.98   | 1.01   | 1.00   | 1.00   | 1.00 | 0.02 | 0.01   | 0      | 0      |
| 3                                                       | Q3    | -4899.82   | 6.56 (189)                                       | -4916.43  | 2.70 (459)                                                 | 0.023   | 1.91                | 1.68   | 1.16   | 1.02   | 1.00   | 0.83 | 0.38 | 0.01   | 0.01   | 0      |
| 4                                                       | Q4    | -4899.79   | 6.58 (188)                                       | -4914.81  | 4.31 (288)                                                 | 0.0019  | 1.89                | 1.66   | 1.17   | 1.03   | 0.98   | 0.94 | 0.31 | 0.01   | 0      | 0      |

|    |     |          |              |          |            |         |      |       |      |      |      |      |      |      |      |   |
|----|-----|----------|--------------|----------|------------|---------|------|-------|------|------|------|------|------|------|------|---|
| 5  | Q5  | -4899.6  | 6.77 (183.1) | -4914.62 | 4.51 (275) | 0.00094 | 1.96 | 1.80  | 1.16 | 1.01 | 1.00 | 0.88 | 0.19 | 0.01 | 0    | 0 |
| 6  | Q6  | -4899.6  | 6.78 (183.0) | -4914.45 | 4.67 (266) | 0.032   | 1.96 | 1.76  | 1.19 | 1.00 | 1.00 | 0.81 | 0.26 | 0.01 | 0.01 | 0 |
| 7  | Q7  | -4899.43 | 6.94 (179)   | -4914.24 | 4.88 (254) | 0.0089  | 1.80 | 1.62  | 1.36 | 1.10 | 1.00 | 0.88 | 0.23 | 0.01 | 0.01 | 0 |
| 8  | Q8  | -4899.14 | 7.24 (171.4) | -4914.01 | 5.12 (242) | 0.0024  | 1.92 | 1.90  | 1.08 | 1.06 | 1.00 | 0.99 | 0.03 | 0.01 | 0    | 0 |
| 9  | Q9  | -4899.13 | 7.25 (171.1) | -4913.53 | 5.60 (221) | 0.018   | 1.76 | 1.71  | 1.06 | 1.02 | 0.92 | 0.82 | 0.70 | 0.01 | 0.01 | 0 |
| 10 | Q10 | -4899.09 | 7.28 (170)   | -4913.46 | 5.67 (219) | 0.021   | 1.86 | 1.65  | 1.10 | 1.05 | 0.97 | 0.75 | 0.60 | 0.01 | 0.01 | 0 |
| 11 | Q11 | -4898.72 | 7.65 (162)   | -4913.28 | 5.84 (212) | 0.003   | 1.83 | 1.76  | 1.21 | 1.09 | 1.01 | 0.96 | 0.14 | 0.01 | 0.01 | 0 |
| 12 | Sp1 | -4898.52 | -            | -4913.22 | -          | 0.003   | 1.82 | 1.70  | 1.18 | 1.14 | 1.03 | 1.00 | 0.12 | 0.01 | 0    | 0 |
| 13 | Sp2 | -4898.26 | -            | -4912.92 | -          | 0.0004  | 1.71 | 1.54  | 1.20 | 1.08 | 0.99 | 0.81 | 0.65 | 0.01 | 0.01 | 0 |
| 14 | Q12 | -4897.74 | 8.63 (144)   | -4912.08 | 7.05 (176) | 0.0078  | 1.69 | 1.44  | 1.26 | 1.10 | 0.8  | 0.84 | 0.68 | 0.01 | 0.01 | 0 |
| 15 | Q13 | -4897.15 | 9.22 (135)   | -4911.73 | 7.39 (168) | 0.016   | 1.90 | 1.39  | 1.12 | 1.07 | 1.00 | 0.84 | 0.67 | 0.01 | 0    | 0 |
| 16 | Q14 | -4897.06 | 9.31 (133)   | -4911.53 | 7.59 (163) | 0.0028  | 1.94 | 1.45  | 1.07 | 1.07 | 1.01 | 0.88 | 0.57 | 0.01 | 0    | 0 |
| 17 | Q15 | -4896.81 | 9.57 (130)   | -4911.44 | 7.69 (161) | 0.002   | 1.98 | 1.23  | 1.04 | 1.02 | 1.02 | 0.99 | 0.71 | 0    | 0    | 0 |
| 18 | Q16 | -4896.39 | 9.98 (124)   | -4911.27 | 7.85 (158) | 0.03    | 1.98 | 1.34  | 1.04 | 1.01 | 0.99 | 0.92 | 0.71 | 0.01 | 0    | 0 |
| 19 | Q17 | -4896.3  | 10.07 (123)  | -4911.09 | 8.04 (154) | 0.0019  | 1.97 | 1.533 | 1.09 | 1.03 | 0.99 | 0.92 | 0.46 | 0    | 0    | 0 |
| 20 | Q18 | -4896.21 | 10.17 (122)  | -4910.92 | 8.21 (151) | 0.019   | 1.91 | 1.36  | 1.14 | 1.08 | 0.95 | 0.89 | 0.65 | 0.01 | 0.01 | 0 |
| 21 | Q19 | -4896.16 | 10.21 (121)  | -4910.31 | 8.81 (141) | 0.01    | 1.71 | 1.32  | 1.27 | 1.21 | 1.00 | 0.84 | 0.64 | 0.01 | 0.01 | 0 |
| 22 | Q20 | -4896.16 | 10.21 (121)  | -4909.49 | 9.64 (129) | 0.03    | 1.90 | 1.80  | 1.14 | 1.02 | 0.98 | 0.93 | 0.22 | 0.01 | 0    | 0 |

**Table S10.** Energies and orbital populations of  $\text{OsCl}_5(\text{H}_2\text{O})^-$  and  $\text{OsCl}_5(\text{OH})^{2-}$  in quintet state as a result of SBKJC aqueous phase calculations (FireFly package).

|                                                   | State | Energy, eV | Energy of transition $l \rightarrow i$ , eV (nm) | XMC-QDPT2 | XMC-QDPT2 energy of transition $l \rightarrow i$ , eV (nm) | f        | Orbitals population |        |        |        |        |      |      |        |        |        |
|---------------------------------------------------|-------|------------|--------------------------------------------------|-----------|------------------------------------------------------------|----------|---------------------|--------|--------|--------|--------|------|------|--------|--------|--------|
|                                                   |       |            |                                                  |           |                                                            |          | HOMO-5              | HOMO-4 | HOMO-3 | HOMO-2 | HOMO-1 | HOMO | LUMO | LUMO+1 | LUMO+2 | LUMO+3 |
|                                                   |       |            |                                                  |           |                                                            |          | A                   | A      | A      | A      | A      | A    | A    | A      | A      | A      |
| <b><math>\text{OsCl}_5(\text{OH})^{2-}</math></b> |       |            |                                                  |           |                                                            |          |                     |        |        |        |        |      |      |        |        |        |
| 1                                                 | Q1    | -4913.46   | 0                                                | -4924.76  | 0                                                          | -        | 2.00                | 2.00   | 1.00   | 1.00   | 1.00   | 1.00 | 0    | 0      | 0      | 0      |
| 2                                                 | Q2    | -4907.33   | 6.13 (202)                                       | -4923.47  | 1.29 (961)                                                 | 3.28E-5  | 1.99                | 1.99   | 1.01   | 1.00   | 1.00   | 0.99 | 0.02 | 0      | 0      | 0      |
| 3                                                 | Q3    | -4907.12   | 6.34 (196)                                       | -4922.32  | 2.44 (508)                                                 | 0.0032   | 1.99                | 1.96   | 1.02   | 1.00   | 1.00   | 0.99 | 0.02 | 0      | 0      | 0      |
| 4                                                 | Q4    | -4906.96   | 6.50 (191)                                       | -4922.13  | 2.63 (471)                                                 | 0.0017   | 2.00                | 1.97   | 1.00   | 1.00   | 1.00   | 1.00 | 0.02 | 0      | 0      | 0      |
| 5                                                 | Q5    | -4906.9    | 6.57 (189)                                       | -4921.97  | 2.79 (444)                                                 | 0.00014  | 2.00                | 1.98   | 1.01   | 1.00   | 1.00   | 1.00 | 0.02 | 0      | 0      | 0      |
| 6                                                 | Q6    | -4906.29   | 7.17 (173)                                       | -4921.91  | 2.85 (435)                                                 | 0.0058   | 1.99                | 1.97   | 1.01   | 1.01   | 1.00   | 1.00 | 0.01 | 0      | 0      | 0      |
| 7                                                 | Q7    | -4905.7    | 7.76 (160)                                       | -4921.7   | 3.06 (405)                                                 | 9.20E-6  | 2.00                | 1.99   | 1.00   | 1.00   | 1.00   | 1.00 | 0.01 | 0      | 0      | 0      |
| 8                                                 | Q8    | -4905.04   | 8.41 (147)                                       | -4921.6   | 3.16 (392)                                                 | 7.60E-6  | 2.00                | 1.97   | 1.01   | 1.00   | 1.00   | 0.99 | 0.02 | 0      | 0      | 0      |
| 9                                                 | Q9    | -4904.72   | 8.75 (142)                                       | -4921.55  | 3.21 (386)                                                 | 3.63E-5  | 1.97                | 1.94   | 1.01   | 1.01   | 1.00   | 0.98 | 0.08 | 0      | 0      | 0      |
| 10                                                | Sp1   | -4904.04   | -                                                | -4921.27  | -                                                          | 0.00032  | 2.00                | 1.23   | 1.00   | 1.00   | 1.00   | 1.00 | 0.77 | 0      | 0      | 0      |
| 11                                                | Q10   | -4903.71   | 9.75 (127)                                       | -4921.18  | 3.58 (346)                                                 | 0.0043   | 1.99                | 1.38   | 1.00   | 1.00   | 1.00   | 1.00 | 0.62 | 0      | 0      | 0      |
| 12                                                | Q11   | -4903.48   | 9.98 (124)                                       | -4920.61  | 4.15 (299)                                                 | 0.0024   | 1.89                | 1.80   | 1.06   | 1.00   | 1.00   | 0.95 | 0.30 | 0      | 0      | 0      |
| 13                                                | Q12   | -4903.37   | 10.10 (123)                                      | -4920.5   | 4.26 (291)                                                 | 3.00E-5  | 1.97                | 1.90   | 1.06   | 1.00   | 1.00   | 0.98 | 0.08 | 0      | 0      | 0      |
| 14                                                | Q13   | -4903.27   | 10.19 (122)                                      | -4920.27  | 4.49 (276)                                                 | 0.00034  | 1.99                | 1.91   | 1.03   | 1.00   | 1.00   | 0.99 | 0.08 | 0      | 0      | 0      |
| 15                                                | Q14   | -4902.61   | 10.85 (114.3)                                    | -4920.21  | 4.55 (273)                                                 | 0.0046   | 1.96                | 1.70   | 1.11   | 1.01   | 0.99   | 0.90 | 0.34 | 0      | 0      | 0      |
| 16                                                | Q15   | -4902.6    | 10.86 (114.2)                                    | -4920.2   | 4.56 (272)                                                 | 0.048    | 2.00                | 1.78   | 1.07   | 1.01   | 1.00   | 1.00 | 0.14 | 0      | 0      | 0      |
| 17                                                | Q16   | -4902.55   | 10.91 (113.7)                                    | -4920.1   | 4.66 (266)                                                 | 6.02E-5  | 1.78                | 1.71   | 1.04   | 1.03   | 0.98   | 0.83 | 0.62 | 0      | 0      | 0      |
| 18                                                | Q17   | -4901.94   | 11.52 (108)                                      | -4919.97  | 4.79 (259)                                                 | 4.976E-8 | 1.97                | 1.85   | 1.08   | 1.03   | 1.00   | 0.94 | 0.12 | 0      | 0      | 0      |
| 19                                                | Q18   | -4901.68   | 11.78 (105.3)                                    | -4919.94  | 4.82 (257)                                                 | 5.25E-6  | 2.00                | 1.89   | 1.04   | 1.00   | 1.00   | 0.96 | 0.11 | 0      | 0      | 0      |
| 20                                                | Q19   | -4901.62   | 11.84 (104.7)                                    | -4919     | 5.76 (215)                                                 | 7.53E-5  | 1.80                | 1.57   | 1.19   | 1.11   | 1.00   | 0.98 | 0.33 | 0      | 0      | 0      |
| 21                                                | Q20   | -4901.55   | 11.91 (104)                                      | -4918.87  | 5.89 (211)                                                 | 0.00081  | 1.89                | 1.12   | 1.09   | 1.02   | 1.00   | 0.98 | 0.90 | 0      | 0      | 0      |
| 22                                                | Q21   | -4901.25   | 12.21 (102)                                      | -4918.69  | 6.07 (204)                                                 | 0.0031   | 1.96                | 1.16   | 1.04   | 1.02   | 1.00   | 0.97 | 0.84 | 0      | 0      | 0      |

**Table S11.** Electronic and geometric structure of H<sub>2</sub>O and H<sub>3</sub>O<sup>+</sup>. Multiplicity M; bond lengths RH-Cl, RO-H(1), RO-H(2); bond angles ∠ H(1)OH(2); atom charges q<sub>O</sub>, q<sub>Cl</sub>, q<sub>H(1)</sub>, q<sub>H(2)</sub>; total energy E<sub>0</sub>.

|                                  | Structure                     | RO-H(1), Å<br>RO-H(2), Å<br>RO-H(3), Å | ∠H(1)OH(2)<br>∠H(1)OH(3)<br>∠H(2)OH(3) | q <sub>O</sub> | q <sub>H(1)</sub> ,<br>q <sub>H(2)</sub><br>q <sub>H(3)</sub> | E <sub>TOTAL</sub> ,<br>Hartree | E <sub>TOTAL</sub> ,<br>eV |
|----------------------------------|-------------------------------|----------------------------------------|----------------------------------------|----------------|---------------------------------------------------------------|---------------------------------|----------------------------|
| <b>ROHF/IMCP-SR1 (gas)</b>       |                               |                                        |                                        |                |                                                               |                                 |                            |
| 1                                | H <sub>2</sub> O              | 0.944<br>0.944<br>-                    | 105.541<br>-<br>-                      | -0.313         | 0.156<br>0.156<br>-                                           | -16.9635                        | -461.60                    |
| 2                                | H <sub>3</sub> O <sup>+</sup> | 0.962<br>0.962<br>0.962                | 120.026<br>119.987<br>119.987          | 0.033          | 0.322<br>0.322<br>0.322                                       | -17.2371                        | -469.05                    |
| <b>ROHF/IMCP-SR1/PCM (water)</b> |                               |                                        |                                        |                |                                                               |                                 |                            |
| 3                                | H <sub>2</sub> O              | 0.948<br>0.948<br>-                    | 104.999<br>-<br>-                      | -0.400         | 0.200<br>0.200<br>-                                           | -16.9745                        | -461.90                    |
| 4                                | H <sub>3</sub> O <sup>+</sup> | 1.051<br>1.051<br>1.063                | 123.200<br>118.400<br>118.400          | 0.039          | 0.321<br>0.322<br>0.318                                       | -17.3666                        | -472.57                    |
| <b>ROHF/SBKJC (gas)</b>          |                               |                                        |                                        |                |                                                               |                                 |                            |
| 5                                | H <sub>2</sub> O              | 0.967<br>0.967<br>-                    | 110.089<br>-<br>-                      | -0.606         | 0.303<br>0.303<br>-                                           | -16.8193                        | -457.68                    |
| 6                                | H <sub>3</sub> O <sup>+</sup> | 0.979<br>0.979<br>0.979                | 120.000<br>120.000<br>120.000          | -0.485         | 0.495<br>0.495<br>0.495                                       | -17.0998                        | -465.31                    |
| <b>ROHF/SBKJC (water)</b>        |                               |                                        |                                        |                |                                                               |                                 |                            |
| 7                                | H <sub>2</sub> O              | 1.002<br>1.001<br>-                    | 105.401<br>-<br>-                      | -0.708         | 0.354<br>0.354<br>-                                           | -16.8308                        | -457.99                    |
| 8                                | H <sub>3</sub> O <sup>+</sup> | 0.96497<br>0.96471<br>0.96447          | 121.134<br>118.755<br>120.102          | -0.451         | 0.484<br>0.485<br>0.482                                       | -17.2323                        | -468.92                    |



**Table S12.** The thermochemical characteristics of photoaquation products and H<sub>2</sub>O and H<sub>3</sub>O<sup>+</sup> calculated at 298 K. Multiplicity M; energy E, enthalpy H, Gibbs free energy G, entropy S, logarithm of statistical sum lnQ<sub>i</sub>.

|                                                     | Method        | M | E, eV    | H, eV    | G, eV    | S, eV/K    | ln Q <sub>el</sub> | ln Q <sub>TRANS</sub> | ln Q <sub>rot</sub> | ln Q <sub>vib</sub> |
|-----------------------------------------------------|---------------|---|----------|----------|----------|------------|--------------------|-----------------------|---------------------|---------------------|
| <b>OsCl<sub>5</sub>(H<sub>2</sub>O)<sup>-</sup></b> |               |   |          |          |          |            |                    |                       |                     |                     |
| 1                                                   | ROHF/IMCP-SR1 | 3 | 1.196088 | 1.221587 | -0.1963  | 0.00475559 | 1.098612           | 19.508270             | 14.194569           | 7.752374            |
| 2                                                   | ROHF/IMCP-SR1 | 5 | 1.174373 | 1.199872 | -0.778   | 0.0066337  | 1.609438           | 19.508270             | 13.631587           | 31.047479           |
| 3                                                   | ROHF/SBKJC    | 3 | 1.181855 | 1.207311 | -0.18417 | 0.00466709 | 1.098612           | 19.508270             | 14.218236           | 7.133274            |
| 4                                                   | ROHF/SBKJC    | 5 | 1.150852 | 1.176308 | -0.16073 | 0.00448447 | 1.609438           | 19.508270             | 14.218251           | 5.982369            |
| <b>OsCl<sub>5</sub>(OH)<sup>2-</sup></b>            |               |   |          |          |          |            |                    |                       |                     |                     |
| 5                                                   | ROHF/IMCP-SR1 | 3 | 0.826331 | 0.85183  | -0.51974 | 0.00460018 | 1.098612           | 19.504336             | 14.216528           | 6.780932            |
| 6                                                   | ROHF/IMCP-SR1 | 5 | 0.837081 | 0.86258  | -0.62814 | 0.00499991 | 1.609438           | 19.504336             | 14.337747           | 9.360135            |
| 7                                                   | ROHF/SBKJC    | 3 | 0.849766 | 0.875265 | -0.51458 | 0.0046615  | 1.098612           | 19.504336             | 14.213988           | 7.113717            |
| 8                                                   | ROHF/SBKJC    | 5 | 0.841983 | 0.867439 | -0.58777 | 0.00488084 | 1.609438           | 19.504336             | 14.315425           | 8.438571            |
| <b>H<sub>2</sub>O</b>                               |               |   |          |          |          |            |                    |                       |                     |                     |
| 9                                                   | ROHF/IMCP-SR1 | 1 | 0.684517 | 0.709973 | 0.115455 | 0.00199404 | 0.000000           | 14.915558             | 4.418084            | 0.000228            |
| 10                                                  | ROHF/SBKJC    | 1 | 0.623156 | 0.648612 | 0.049923 | 0.00200801 | 0.000000           | 14.915558             | 4.581707            | 0.000210            |
| <b>H<sub>3</sub>O<sup>+</sup></b>                   |               |   |          |          |          |            |                    |                       |                     |                     |
| 11                                                  | ROHF/IMCP-SR1 | 1 | 0.9976   | 1.023056 | 0.406909 | 0.00206662 | 0.000000           | 14.997230             | 5.181022            | 0.000781            |
| 12                                                  | ROHF/SBKJC    | 1 | 1.012134 | 1.037633 | 0.420626 | 0.00206942 | 0.000000           | 14.997230             | 5.194453            | 0.003968            |

**Figure S1.** Scheme of  $\text{Os}^{\text{IV}}\text{Cl}_6^{2-}$  structure.

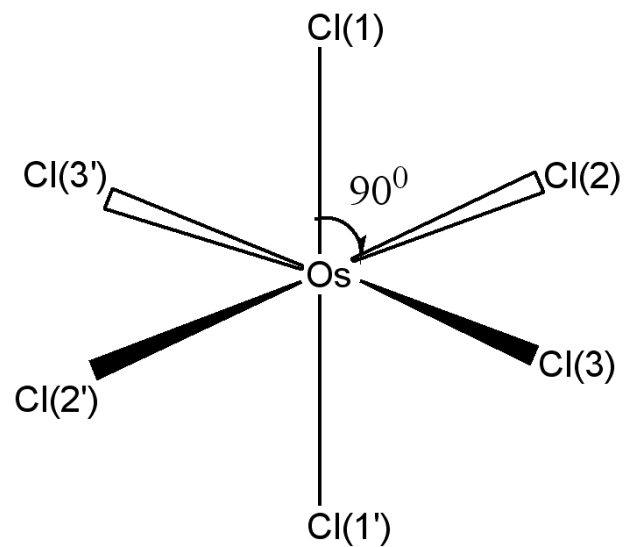

**Figure S2a.** Scheme of  $\text{OsCl}_5^{2-}$  (Planar) structure.

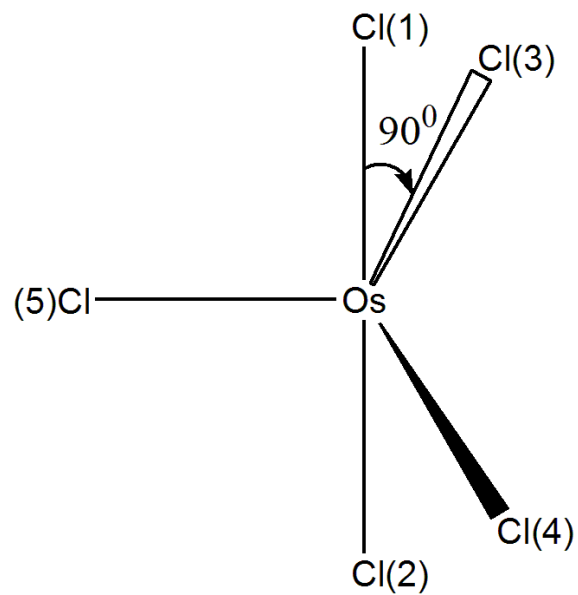

**Figure S2b.** Scheme of  $\text{OsCl}_5^{2-}$  (Axial) structure.

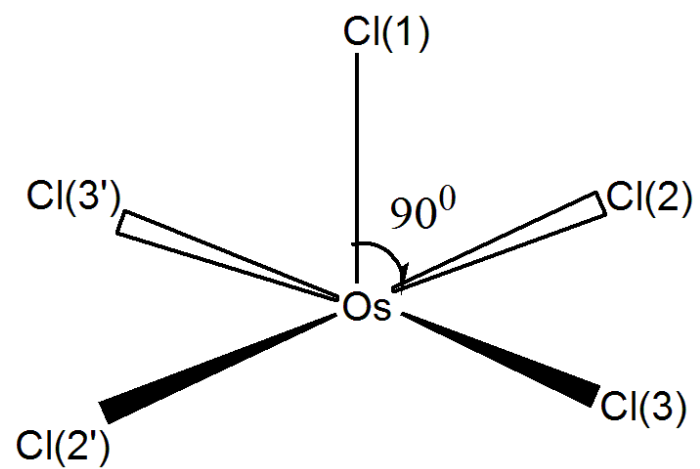

**Figure S3.** Scheme of structure of  $\text{OsCl}_5(\text{H}_2\text{O})^-$

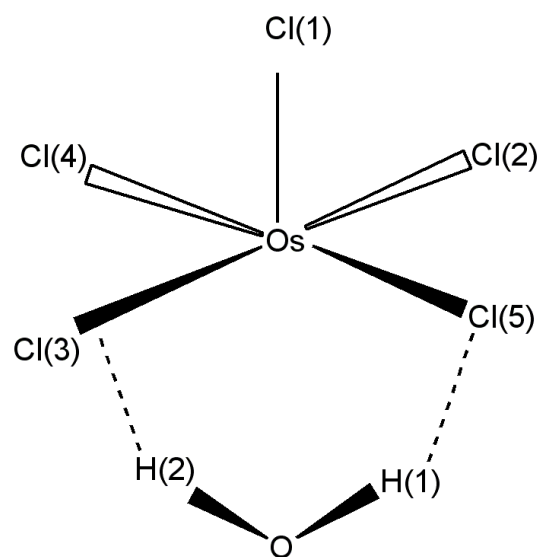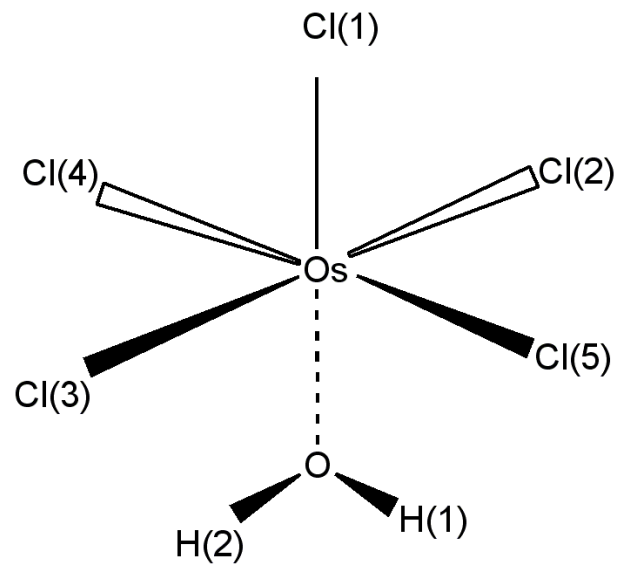

**Figure S4.** Scheme of structure of  $\text{OsCl}_5(\text{OH})^{2-}$

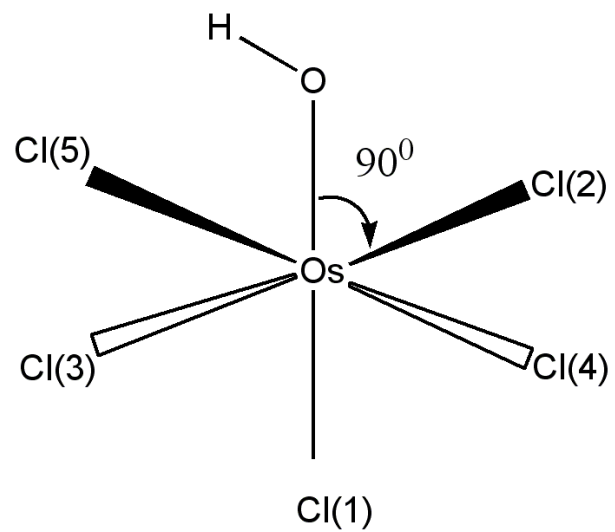

Supplement: c8pp00553b1.pdf [file c8pp00553b1.pdf]
